# Supplementary material
Source: PubMed Central journal article supplement (PMC3793343)
Supplement: NIHMS518106-supplement-supp_fig_1_2.pdf [file NIHMS518106-supplement-supp_fig_1_2.pdf]

Supplementary Figure 1

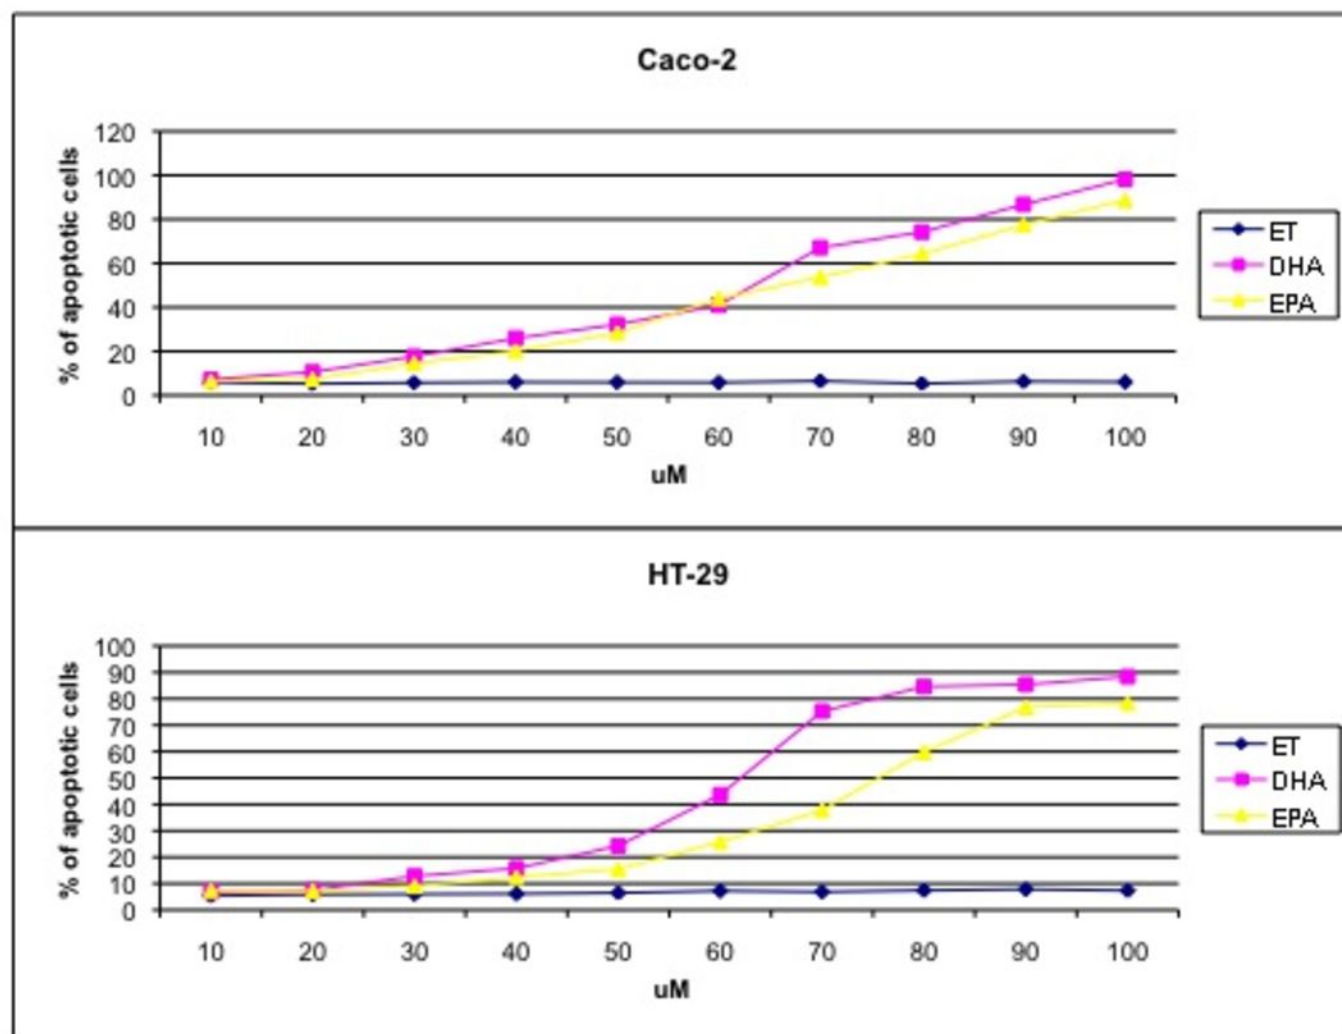

**Supplementary Figure 2**

| <b>EPA</b> | <b>Apoptotic Index</b> | <b>DHA</b> | <b>Apoptotic Index</b> | <b>Control</b> | <b>Apoptotic Index</b> |
|------------|------------------------|------------|------------------------|----------------|------------------------|
| 24hr       | 0.49%                  | 24hr       | 0.28%                  | 24hr           | 0.67%                  |
| 36hr       | 0.64%                  | 36hr       | 0.34%                  | 36hr           | 0.50%                  |
| 48hr       | 0.92%                  | 48hr       | 1.41%                  | 48hr           | 0.00%                  |
